# Supplementary material
Source: Copernicus journal article supplement (doi:10.5194/essd-18-2609-2026)
Supplement: Supplementary file 1 [file essd-18-2609-2026-supplement.pdf]

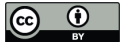

*Supplement of*

## **BuildingSense: a new multimodal building function classification dataset**

**Pengxiang Su et al.**

*Correspondence to:* Wei Huang ([wei\\_huang@tongji.edu.cn](mailto:wei_huang@tongji.edu.cn))

The copyright of individual parts of the supplement might differ from the article licence.

Section S1. Supplementary figures

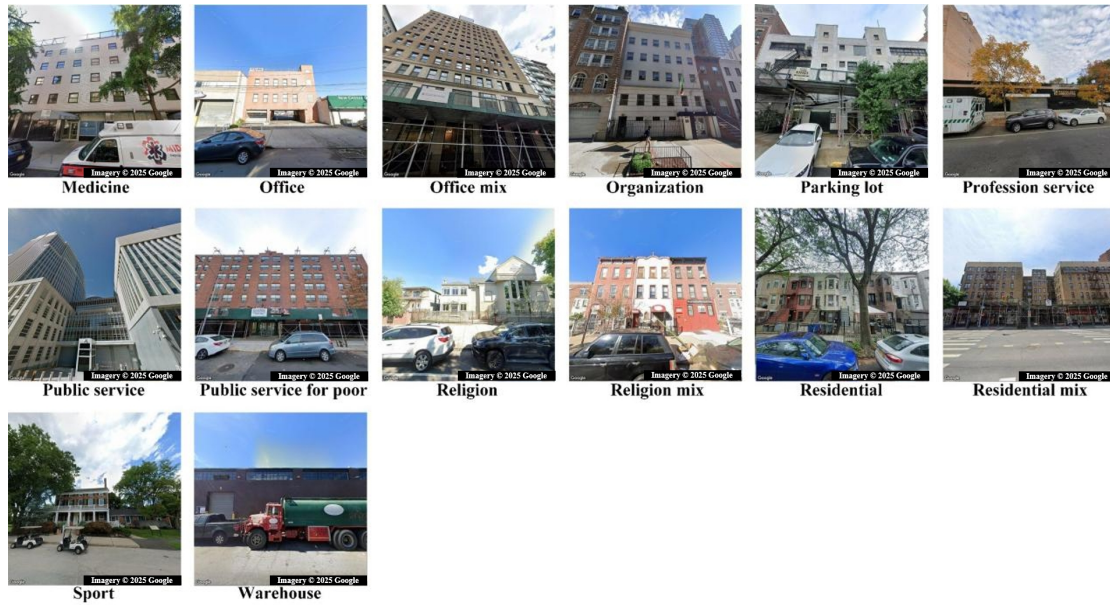

Figure S1 Supplementary example of each building function category

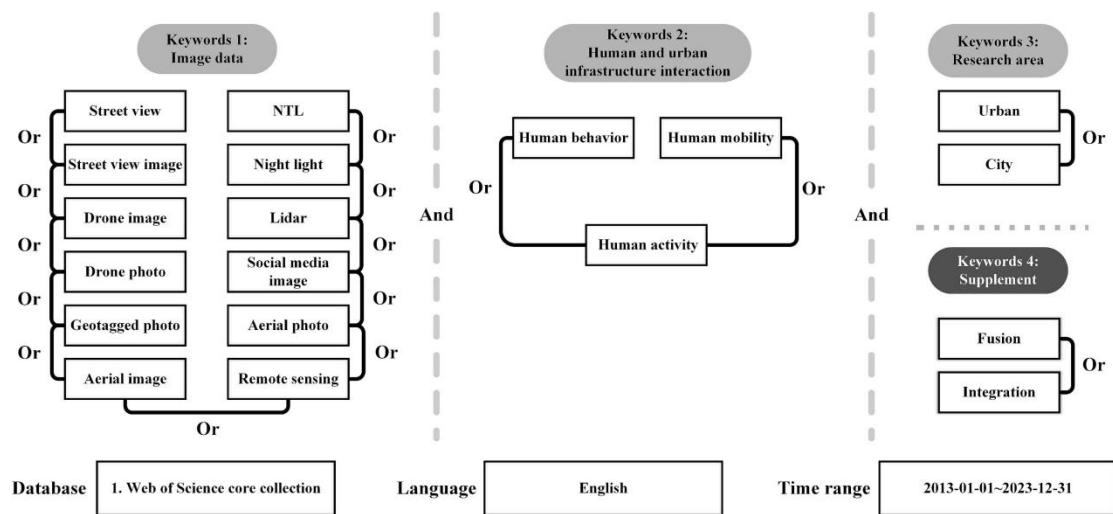

Figure S2 Keywords group used for human and urban infrastructure-related paper searching

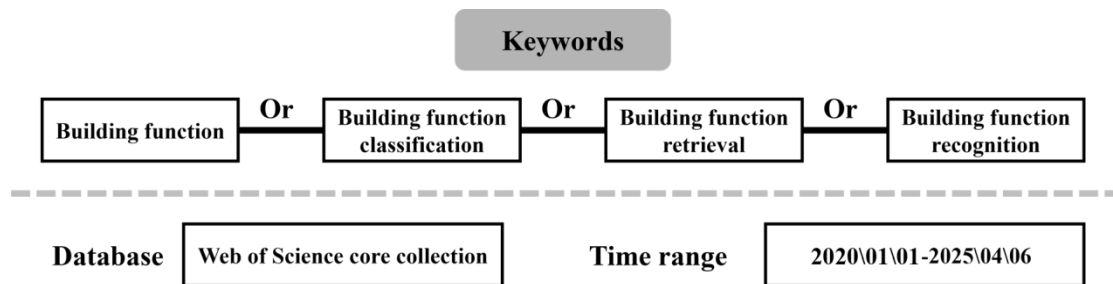

Figure S3 Keywords group used for building function-related paper searching

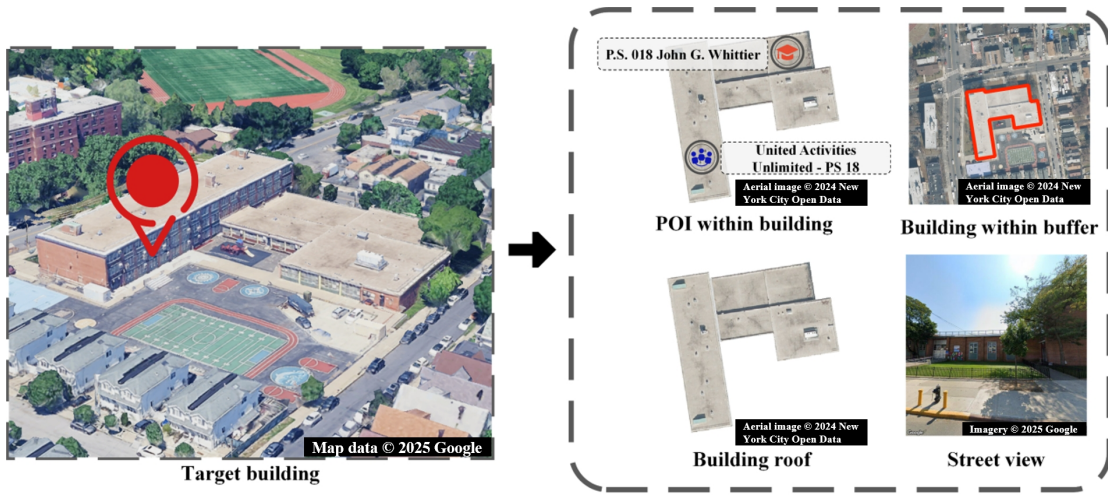

Figure S4 Example of raw data

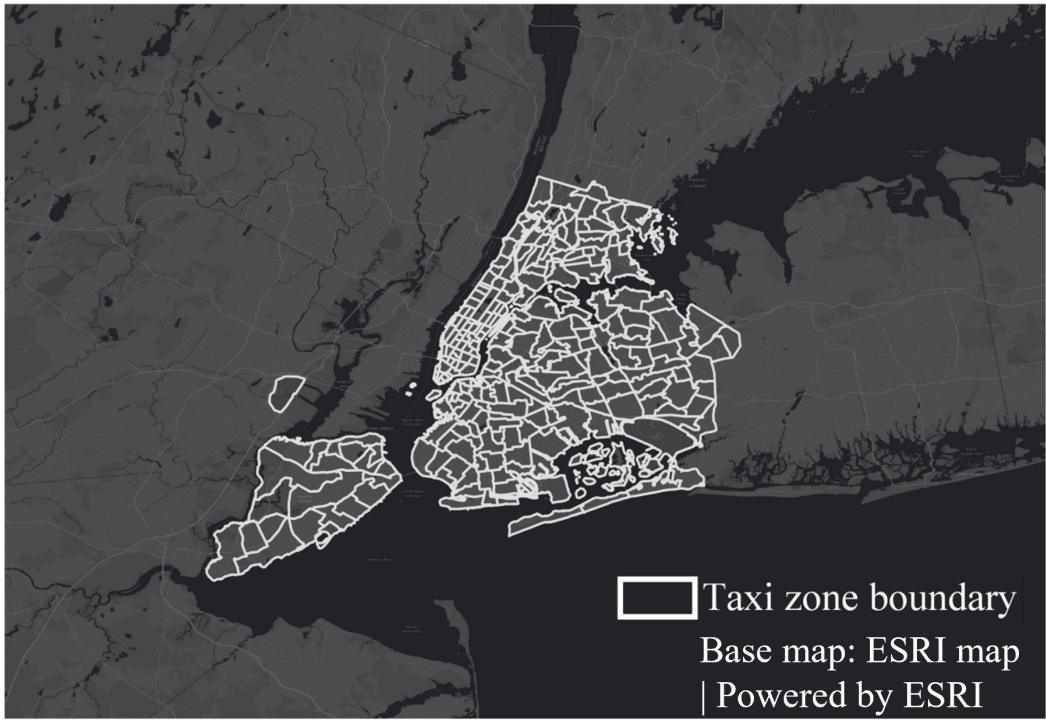

Figure S5 Taxi zones in New York City (NYC)

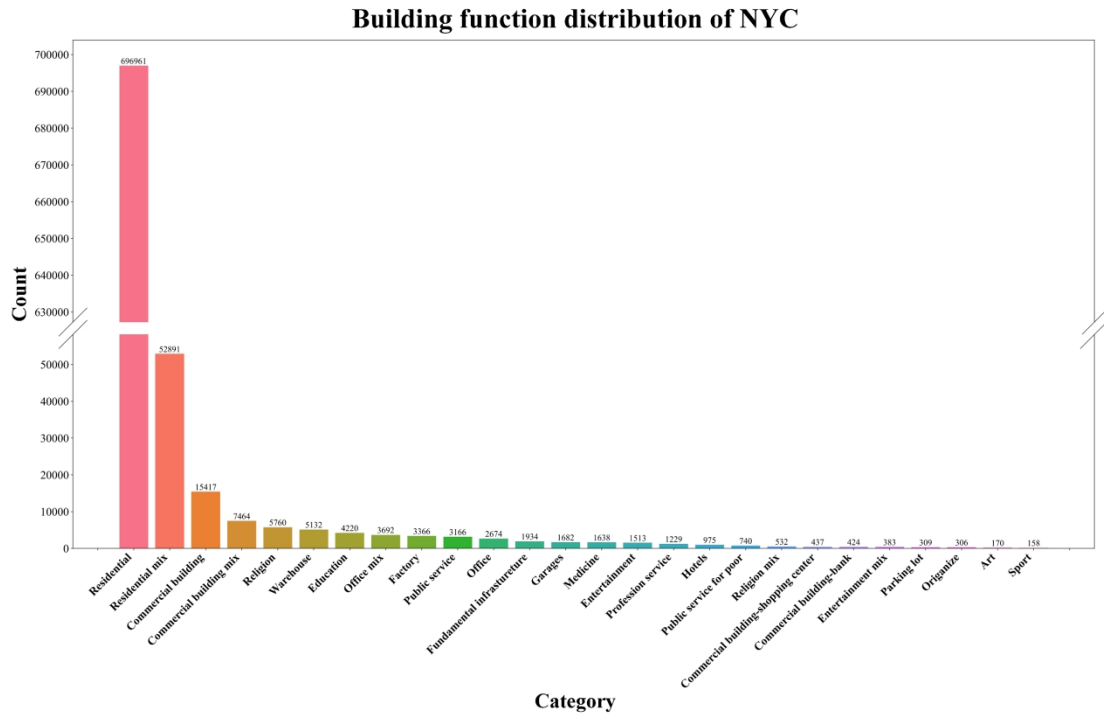

**Figure S6** Building function distribution of NYC

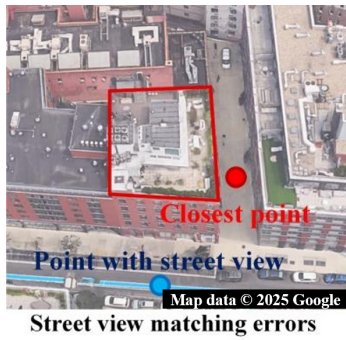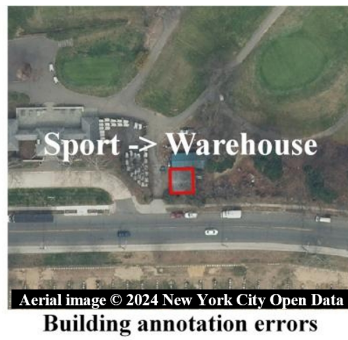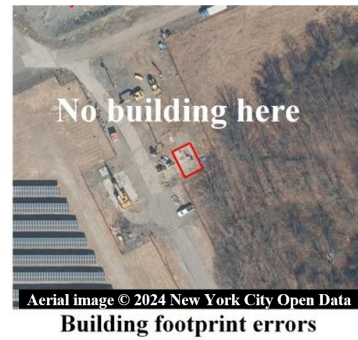

**Figure S7** Example of errors

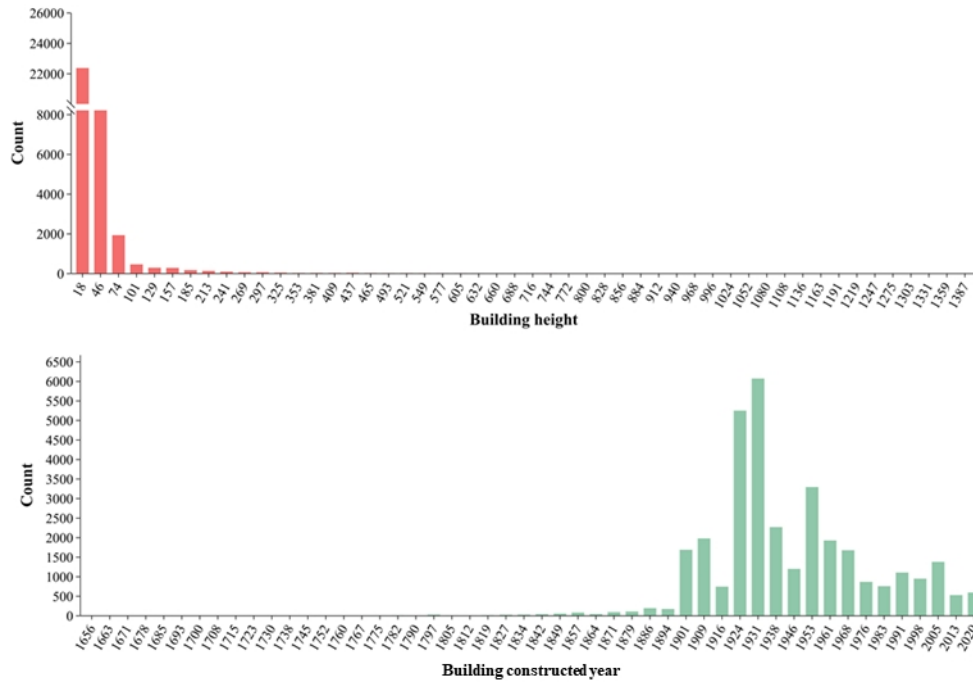

Figure S8 Distribution of building height and constructed year

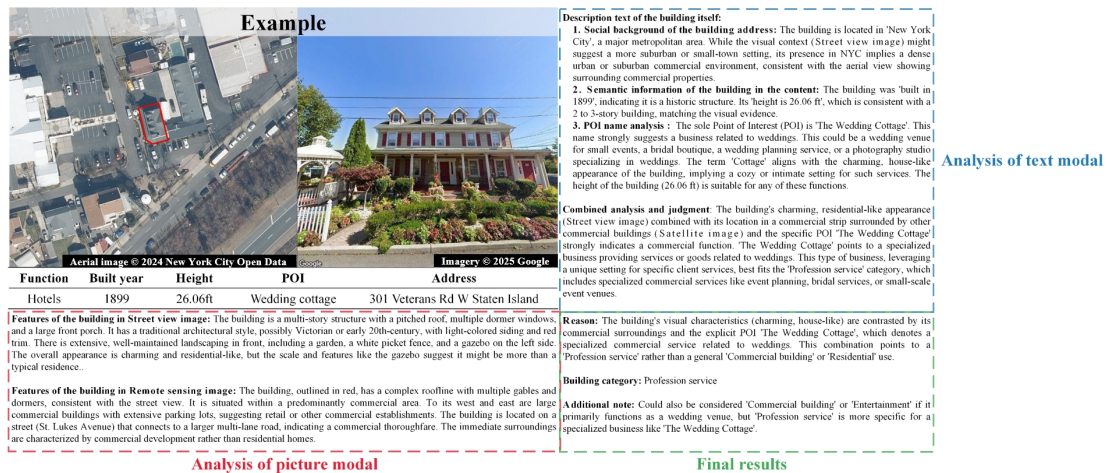

Figure S9 Example of large model output

## Section S2. Methodology

**Table S1. Definition of building function (26)**

| <b>Building code</b> | <b>Description</b>                                    | <b>Category</b>                 | <b>Building category</b> |
|----------------------|-------------------------------------------------------|---------------------------------|--------------------------|
| E1                   | GENERAL WAREHOUSE                                     | Warehouses                      | Warehouse                |
| E2                   | CONTRACTORS WAREHOUSE                                 | Warehouses                      | Warehouse                |
| E7                   | SELF-STORAGE WAREHOUSES                               | Warehouses                      | Warehouse                |
| RS                   | NON-BUSINESS STORAGE SPACE                            | Condominiums                    | Warehouse                |
| RW                   | WAREHOUSE FOR INDUSTRIAL                              | Condominiums                    | Warehouse                |
| Q3                   | OUTDOOR POOL                                          | Outdoor recreational facilities | Sport                    |
| Q5                   | GOLF COURSE                                           | Outdoor recreational facilities | Sport                    |
| Q7                   | TENNIS COURT                                          | Outdoor recreational facilities | Sport                    |
| Z0                   | TENNIS COURT; POOL; SHED; ETC.                        | Misc. Building classifications  | Sport                    |
| C7                   | WALK-UP APT. OVER SIX FAMILIES WITH STORES            | Walk up apartments              | Residential mix          |
| D6                   | ELEVATOR APT; FIREPROOF WITH STORES                   | Elevator apartments             | Residential mix          |
| D7                   | ELEVATOR APT; SEMI-FIREPROOF WITH STORES              | Elevator apartments             | Residential mix          |
| L8                   | LOFT; WITH RETAIL STORES OTHER THAN TYPE ONE          | Lofts                           | Residential mix          |
| L9                   | MISCELLANEOUS LOFT                                    | Lofts                           | Residential mix          |
| RD                   | MIXED RESIDENTIAL CONDO BUILDING CLASSIFICATION CODES | Condominiums                    | Residential mix          |
| RM                   | MIX COMMERCIAL                                        | Condominiums                    | Residential mix          |
| RX                   | MIXED RESIDENTIAL, COMMERCIAL & INDUSTRIAL            | Condominiums                    | Residential mix          |
| RZ                   | MIXED RESIDENTIAL & WAREHOUSE                         | Condominiums                    | Residential mix          |
| R7                   | CONDO; COMML.UNIT OF 1-3 UNIT BLDG-ORIG CLASS 1       | Condominiums                    | Residential mix          |
| R8                   | CONDO; COMML.UNIT OF 2-10 UNIT BLDG.                  | Condominiums                    | Residential mix          |
| S0                   | PRIMARILY 1 FAMILY WITH 2 STORES OR OFFICES           | Primarily res. - mixed use      | Residential mix          |
| S1                   | PRIMARILY 1 FAMILY WITH 1 STORE OR OFFICE             | Primarily res. - mixed use      | Residential mix          |

|    |                                                       |                               |                 |
|----|-------------------------------------------------------|-------------------------------|-----------------|
| S2 | PRIMARILY 2 FAMILY WITH 1<br>STORE OR OFFICE          | Primarily res. -<br>mixed use | Residential mix |
| S3 | PRIMARILY 3 FAMILY WITH 1<br>STORE OR OFFICE          | Primarily res. -<br>mixed use | Residential mix |
| S4 | PRIMARILY 4 FAMILY WITH 1<br>STORE OR OFFICE          | Primarily res. -<br>mixed use | Residential mix |
| S5 | PRIMARILY 5-6 FAMILY WITH 1<br>STORE OR OFFICE        | Primarily res. -<br>mixed use | Residential mix |
| S9 | SINGLE OR MULTIPLE DWELLING<br>WITH STORES OR OFFICES | Primarily res. -<br>mixed use | Residential mix |
| A0 | CAPE COD                                              | One family<br>dwellings       | Residential     |
| A1 | TWO STORIES - DETACHED SM OR<br>MID                   | One family<br>dwellings       | Residential     |
| A2 | ONE STORY - PERMANENT LIVING<br>QUARTER               | One family<br>dwellings       | Residential     |
| A3 | LARGE SUBURBAN RESIDENCE                              | One family<br>dwellings       | Residential     |
| A4 | CITY RESIDENCE ONE FAMILY                             | One family<br>dwellings       | Residential     |
| A5 | ONE FAMILY ATTACHED OR<br>SEMI-DETACHED               | One family<br>dwellings       | Residential     |
| A6 | SUMMER COTTAGE                                        | One family<br>dwellings       | Residential     |
| A7 | MANSION TYPE OR TOWN HOUSE                            | One family<br>dwellings       | Residential     |
| A8 | BUNGALOW COLONY -<br>COOPERATIVELY OWNED LAND         | One family<br>dwellings       | Residential     |
| B1 | TWO FAMILY BRICK                                      | Two family<br>dwellings       | Residential     |
| B2 | TWO FAMILY FRAME                                      | Two family<br>dwellings       | Residential     |
| B3 | TWO FAMILY CONVERTED FROM<br>ONE FAMILY               | Two family<br>dwellings       | Residential     |
| C0 | THREE FAMILIES                                        | Walk up<br>apartments         | Residential     |
| C1 | OVER SIX FAMILIES WITHOUT<br>STORES                   | Walk up<br>apartments         | Residential     |
| C2 | FIVE TO SIX FAMILIES                                  | Walk up<br>apartments         | Residential     |
| C3 | FOUR FAMILIES                                         | Walk up<br>apartments         | Residential     |
| C4 | OLD LAW TENEMENT                                      | Walk up<br>apartments         | Residential     |

---

|    |                                                      |                        |             |
|----|------------------------------------------------------|------------------------|-------------|
| C5 | CONVERTED DWELLINGS OR<br>ROOMING HOUSE              | Walk up<br>apartments  | Residential |
| C6 | WALK-UP COOPERATIVE                                  | Walk up<br>apartments  | Residential |
| C8 | WALK-UP CO-OP; CONVERSION<br>FROM LOFT/WAREHOUSE     | Walk up<br>apartments  | Residential |
| C9 | GARDEN APARTMENTS                                    | Walk up<br>apartments  | Residential |
| CB | WALKUP APT LESS THAN 11 UNITS<br>RESIDENTIAL         | Walk up<br>apartments  | Residential |
| CC | WALKUP CO-OP APT LESS THAN 11<br>UNITS RESIDENTIAL   | Walk up<br>apartments  | Residential |
| CM | MOBILE HOMES/TRAILER PARKS                           | Walk up<br>apartments  | Residential |
| D0 | ELEVATOR CO-OP; CONVERSION<br>FROM LOFT/WAREHOUSE    | Elevator<br>apartments | Residential |
| D1 | ELEVATOR APT; SEMI-FIREPROOF<br>WITHOUT STORES       | Elevator<br>apartments | Residential |
| D3 | ELEVATOR APT; FIREPROOF<br>WITHOUT STORES            | Elevator<br>apartments | Residential |
| D4 | ELEVATOR COOPERATIVE                                 | Elevator<br>apartments | Residential |
| D5 | ELEVATOR APT; CONVERTED                              | Elevator<br>apartments | Residential |
| D8 | ELEVATOR APT; LUXURY TYPE                            | Elevator<br>apartments | Residential |
| DB | ELEVATOR APT LESS THAN 11<br>UNITS RESIDENTIAL       | Elevator<br>apartments | Residential |
| DC | ELEVATOR CO-OP APT LESS THAN<br>11 UNITS RESIDENTIAL | Elevator<br>apartments | Residential |
| H6 | APARTMENT HOTEL                                      | Hotels                 | Residential |
| H7 | APARTMENT HOTEL -<br>COOPERATIVELY OWNED             | Hotels                 | Residential |
| H8 | DORMITORY                                            | Hotels                 | Residential |
| L1 | LOFT; OVER 8 STORIES (MID MANH.<br>TYPE)             | Lofts                  | Residential |
| L2 | LOFT; FIREPROOF AND STORAGE<br>TYPE WITHOUT STORES   | Lofts                  | Residential |
| L3 | LOFT; SEMI-FIREPROOF                                 | Lofts                  | Residential |
| RR | CONDOMINIUM RENTALS                                  | Condominiums           | Residential |
| R1 | CONDO; RESIDENTIAL UNIT IN 2-10<br>UNIT BLDG.        | Condominiums           | Residential |
| R2 | CONDO; RESIDENTIAL UNIT IN<br>WALK-UP BLDG.          | Condominiums           | Residential |

---

|    |                                                    |                                                 |                            |
|----|----------------------------------------------------|-------------------------------------------------|----------------------------|
| R3 | CONDO; RESIDENTIAL UNIT IN 1-3<br>STORY BLDG.      | Condominiums                                    | Residential                |
| R4 | CONDO; RESIDENTIAL UNIT IN<br>ELEVATOR BLDG.       | Condominiums                                    | Residential                |
| R6 | CONDO; RESID.UNIT OF 1-3 UNIT<br>BLDG-ORIG CLASS 1 | Condominiums                                    | Residential                |
| M3 | PARSONAGE; RECTORY                                 | Religious<br>facilities                         | Religion mix               |
| M1 | CHURCH; SYNAGOGUE; CHAPEL                          | Religious<br>facilities                         | Religion                   |
| M2 | MISSION HOUSE<br>(NON-RESIDENTIAL)                 | Religious<br>facilities                         | Religion                   |
| M4 | CONVENT                                            | Religious<br>facilities                         | Religion                   |
| M9 | MISCELLANEOUS RELIGIOUS<br>FACILITY                | Religious<br>facilities                         | Religion                   |
| N1 | ASYLUM                                             | Asylums and<br>homes                            | Public service<br>for poor |
| N2 | HOME FOR INDIGENT CHILDREN;<br>AGED; HOMELESS      | Asylums and<br>homes                            | Public service<br>for poor |
| N3 | ORPHANAGE                                          | Asylums and<br>homes                            | Public service<br>for poor |
| N4 | DETENTION HOUSE FOR<br>WAYWARD GIRLS               | Asylums and<br>homes                            | Public service<br>for poor |
| N9 | MISCELLANEOUS ASYLUM; HOME                         | Asylums and<br>homes                            | Public service<br>for poor |
| P5 | COMMUNITY CENTER                                   | Indoor public<br>assembly & cult.<br>Facilities | Public service             |
| P8 | LIBRARY                                            | Indoor public<br>assembly & cult.<br>Facilities | Public service             |
| T1 | AIRPORT; AIRFIELD; TERMINAL                        | Transportation<br>facilities                    | Public service             |
| T2 | PIER; DOCK; BULKHEAD                               | Transportation<br>facilities                    | Public service             |
| T9 | MISCELLANEOUS<br>TRANSPORTATION FACILITY           | Transportation<br>facilities                    | Public service             |
| Y1 | FIRE DEPARTMENT                                    | Government/city<br>departments                  | Public service             |
| Y2 | POLICE DEPARTMENT                                  | Government/city<br>departments                  | Public service             |
| Y3 | PRISON; JAIL; HOUSE OF<br>DETENTION                | Government/city<br>departments                  | Public service             |

---

|    |                                                     |                                                 |                       |
|----|-----------------------------------------------------|-------------------------------------------------|-----------------------|
| Y4 | MILITARY AND NAVAL<br>INSTALLATION                  | Government/city<br>departments                  | Public service        |
| Y5 | DEPARTMENT OF REAL ESTATE                           | Government/city<br>departments                  | Public service        |
| Y6 | DEPARTMENT OF SANITATION                            | Government/city<br>departments                  | Public service        |
| Y7 | DEPARTMENT OF PORTS AND<br>TERMINALS                | Government/city<br>departments                  | Public service        |
| Y8 | DEPARTMENT OF PUBLIC WORKS                          | Government/city<br>departments                  | Public service        |
| Y9 | DEPARTMENT OF<br>ENVIRONMENTAL PROTECTION           | Government/city<br>departments                  | Public service        |
| Z1 | COURT HOUSE                                         | Misc. Building<br>classifications               | Public service        |
| Z3 | POST OFFICE                                         | Misc. Building<br>classifications               | Public service        |
| Z7 | EASEMENT                                            | Misc. Building<br>classifications               | Public service        |
| Z8 | CEMETERY                                            | Misc. Building<br>classifications               | Public service        |
| O7 | PROFESSIONAL BUILDINGS/STAND<br>ALONE FUNERAL HOMES | Office buildings                                | Profession<br>service |
| G6 | LICENSED PARKING LOT                                | Garages                                         | Parking lot           |
| G7 | UNLICENSED PARKING LOT                              | Garages                                         | Parking lot           |
| RG | INDOOR PARKING                                      | Condominiums                                    | Parking lot           |
| RP | OUTDOOR PARKING                                     | Condominiums                                    | Parking lot           |
| Z2 | PUBLIC PARKING AREA                                 | Misc. Building<br>classifications               | Parking lot           |
| P2 | LODGE ROOM                                          | Indoor public<br>assembly & cult.<br>Facilities | Organization          |
| P3 | YWCA; YMCA; YWHA; YMHA; PAL                         | Indoor public<br>assembly & cult.<br>Facilities | Organization          |
| Z4 | FOREIGN GOVERNMENT                                  | Misc. Building<br>classifications               | Organization          |
| Z5 | UNITED NATIONS                                      | Misc. Building<br>classifications               | Organization          |
| O5 | OFFICE WITH COMM - 1 TO 6<br>STORIES                | Office buildings                                | Office mix            |
| O6 | OFFICE WITH COMM 7 - 19 STORIES                     | Office buildings                                | Office mix            |
| O8 | OFFICE WITH APARTMENTS ONLY<br>(NO COMM)            | Office buildings                                | Office mix            |
| J6 | TELEVISION STUDIO                                   | Theatres                                        | Office                |

|    |                                                                                                                                   |                                    |          |
|----|-----------------------------------------------------------------------------------------------------------------------------------|------------------------------------|----------|
| O1 | OFFICE ONLY - 1 STORY                                                                                                             | Office buildings                   | Office   |
| O2 | OFFICE ONLY 2 - 6 STORIES                                                                                                         | Office buildings                   | Office   |
| O3 | OFFICE ONLY 7 - 19 STORIES                                                                                                        | Office buildings                   | Office   |
| O4 | OFFICE ONLY WITH OR WITHOUT<br>COMM - 20 STORIES OR MORE                                                                          | Office buildings                   | Office   |
| RB | OFFICE SPACE                                                                                                                      | Condominiums                       | Office   |
| I1 | HOSPITAL; SANITARIUM; MENTAL<br>INSTITUTION                                                                                       | Hospitals and<br>health facilities | Medicine |
| I2 | INFIRMARY                                                                                                                         | Hospitals and<br>health facilities | Medicine |
| I3 | DISPENSARY                                                                                                                        | Hospitals and<br>health facilities | Medicine |
| I4 | HOSPITAL; STAFF FACILITY                                                                                                          | Hospitals and<br>health facilities | Medicine |
| I5 | HEALTH CENTER; CHILD CENTER;<br>CLINIC                                                                                            | Hospitals and<br>health facilities | Medicine |
| I6 | NURSING HOME                                                                                                                      | Hospitals and<br>health facilities | Medicine |
| I7 | ADULT CARE FACILITY                                                                                                               | Hospitals and<br>health facilities | Medicine |
| I9 | MISCELLANEOUS HOSPITAL;<br>HEALTH CARE FACILITY                                                                                   | Hospitals and<br>health facilities | Medicine |
| HB | BOUTIQUE: 10-100 ROOMS;<br>W/LUXURY FACILITIES; THEMED;<br>STYLISH; W/FULL SVC<br>ACCOMMODATIONS                                  | Hotels                             | Hotels   |
| HH | HOSTELS- BED RENTALS IN<br>DORMITORY-LIKE SETTINGS<br>W/SHARED ROOMS & BATHROOMS                                                  | Hotels                             | Hotels   |
| HR | SRO- 1 OR 2 PEOPLE HOUSED IN<br>INDIVIDUAL ROOMS IN MULTIPLE<br>DWELLING AFFORDABLE HOUSING                                       | Hotels                             | Hotels   |
| HS | EXTENDED STAY/SUITE:<br>AMENITIES SIMILAR TO APT;<br>TYPICALLY CHARGE WEEKLY<br>RATES & LESS EXPENSIVE THAN<br>FULL-SERVICE HOTEL | Hotels                             | Hotels   |
| H1 | LUXURY HOTEL                                                                                                                      | Hotels                             | Hotels   |
| H2 | FULL SERVICE HOTEL                                                                                                                | Hotels                             | Hotels   |
| H3 | LIMITED SERVICE; MANY<br>AFFILIATED WITH; NATIONAL<br>CHAIN                                                                       | Hotels                             | Hotels   |
| H4 | MOTEL                                                                                                                             | Hotels                             | Hotels   |
| H5 | HOTEL; PRIVATE CLUB; LUXURY                                                                                                       | Hotels                             | Hotels   |

|    | TYPE                                           |                                          |                               |
|----|------------------------------------------------|------------------------------------------|-------------------------------|
| RH | HOTEL/BOATEL                                   | Condominiums                             | Hotels                        |
| G0 | GARAGE; RESIDENTIAL TAX CLASS<br>1             | Garages                                  | Garages                       |
| G1 | ALL PARKING GARAGES                            | Garages                                  | Garages                       |
| U0 | UTILITY COMPANY LAND AND<br>BUILDING           | Utility bureau<br>properties             | Fundamental<br>infrastructure |
| U1 | BRIDGE; TUNNEL; HIGHWAY                        | Utility bureau<br>properties             | Fundamental<br>infrastructure |
| U2 | GAS OR ELECTRIC UTILITY                        | Utility bureau<br>properties             | Fundamental<br>infrastructure |
| U3 | CEILING RAILROAD                               | Utility bureau<br>properties             | Fundamental<br>infrastructure |
| U4 | TELEPHONE UTILITY                              | Utility bureau<br>properties             | Fundamental<br>infrastructure |
| U5 | COMMUNICATION FACILITY<br>OTHER THAN TELEPHONE | Utility bureau<br>properties             | Fundamental<br>infrastructure |
| U6 | RAILROAD - PRIVATE OWNERSHIP                   | Utility bureau<br>properties             | Fundamental<br>infrastructure |
| U7 | TRANSPORTATION - PUBLIC<br>OWNERSHIP           | Utility bureau<br>properties             | Fundamental<br>infrastructure |
| U8 | REVOCABLE CONSENT                              | Utility bureau<br>properties             | Fundamental<br>infrastructure |
| U9 | MISCELLANEOUS UTILITY<br>PROPERTY              | Utility bureau<br>properties             | Fundamental<br>infrastructure |
| F1 | FACTORY; HEAVY<br>MANUFACTURING - FIREPROOF    | Factories and<br>industrial<br>buildings | Factory                       |
| F2 | FACTORY; SPECIAL<br>CONSTRUCTION - FIREPROOF   | Factories and<br>industrial<br>buildings | Factory                       |
| F4 | FACTORY; INDUSTRIAL<br>SEMI-FIREPROOF          | Factories and<br>industrial<br>buildings | Factory                       |
| F5 | FACTORY; LIGHT<br>MANUFACTURING                | Factories and<br>industrial<br>buildings | Factory                       |
| F8 | FACTORY; TANK FARM                             | Factories and<br>industrial<br>buildings | Factory                       |
| J5 | THEATRE IN MIXED-USE BUILDING                  | Theatres                                 | Entertainment<br>mix          |
| Q2 | PLAYGROUND                                     | Outdoor<br>recreational                  | Entertainment<br>mix          |

---

|    |                                             |                                           |                   |
|----|---------------------------------------------|-------------------------------------------|-------------------|
|    |                                             | facilities                                |                   |
| Q6 | STADIUM; RACE TRACK;<br>BASEBALL FIELD      | Outdoor recreational facilities           | Entertainment mix |
| Q8 | MARINA; YACHT CLUB                          | Outdoor recreational facilities           | Entertainment mix |
| J1 | THEATRE; ART TYPE LESS THAN<br>400 SEATS    | Theatres                                  | Entertainment     |
| J2 | THEATRE; ART TYPE MORE THAN<br>400 SEATS    | Theatres                                  | Entertainment     |
| J3 | MOTION PICTURE THEATRE WITH<br>BALCONY      | Theatres                                  | Entertainment     |
| J4 | LEGITIMATE THEATRE; SOLE USE                | Theatres                                  | Entertainment     |
| J7 | OFF BROADWAY TYPE THEATRE                   | Theatres                                  | Entertainment     |
| J8 | MULTIPLEX PICTURE THEATRE                   | Theatres                                  | Entertainment     |
| J9 | MISCELLANEOUS THEATRE                       | Theatres                                  | Entertainment     |
| P4 | BEACH CLUB                                  | Indoor public assembly & cult. Facilities | Entertainment     |
| P6 | AMUSEMENT PLACE; BATH HOUSE;<br>BOAT HOUSE  | Indoor public assembly & cult. Facilities | Entertainment     |
| Q0 | OPEN SPACE                                  | Outdoor recreational facilities           | Entertainment     |
| Q1 | PARKS/RECREATION FACILITY                   | Outdoor recreational facilities           | Entertainment     |
| Q4 | BEACH                                       | Outdoor recreational facilities           | Entertainment     |
| W1 | PUBLIC ELEMENTARY; JUNIOR OR<br>SENIOR HIGH | Educational facilities                    | Education         |
| W2 | PAROCHIAL SCHOOL; YESHIVA                   | Educational facilities                    | Education         |
| W3 | SCHOOL OR ACADEMY                           | Educational facilities                    | Education         |
| W4 | TRAINING SCHOOL                             | Educational facilities                    | Education         |
| W5 | CITY UNIVERSITY                             | Educational facilities                    | Education         |
| W6 | OTHER COLLEGE AND UNIVERSITY                | Educational facilities                    | Education         |

---

|    |                                                                                 |                        |                                     |
|----|---------------------------------------------------------------------------------|------------------------|-------------------------------------|
| W7 | THEOLOGICAL SEMINARY                                                            | Educational facilities | Education                           |
| W8 | OTHER PRIVATE SCHOOL                                                            | Educational facilities | Education                           |
| W9 | MISCELLANEOUS EDUCATIONAL FACILITY                                              | Educational facilities | Education                           |
| K4 | PREDOMINANT RETAIL WITH OTHER USES                                              | Store buildings        | Commercial building mix             |
| RC | MIX COMMERCIAL MIXED                                                            | Condominiums           | Commercial building mix             |
| RI | WAREHOUSE/FACTORY/INDUSTRIAL & COMMERCIAL                                       | Condominiums           | Commercial building mix             |
| K6 | SHOPPING CENTER WITH OR WITHOUT PARKING                                         | Store buildings        | Commercial building-shopping center |
| K7 | BANKING FACILITIES WITH OR WITHOUT PARKING                                      | Store buildings        | Commercial building-bank            |
| G2 | AUTO BODY/COLLISION OR AUTO REPAIR                                              | Garages                | Commercial building                 |
| G8 | CAR SALES/RENTAL WITH SHOWROOM                                                  | Garages                | Commercial building                 |
| GU | CAR SALES OR RENTAL LOTS WITHOUT SHOWROOM                                       | Garages                | Commercial building                 |
| GW | CAR WASH OR LUBRITORIUM FACILITY                                                | Garages                | Commercial building                 |
| K1 | ONE STORY RETAIL BUILDING                                                       | Store buildings        | Commercial building                 |
| K2 | MULTI-STORY RETAIL BUILDING (2 OR MORE)                                         | Store buildings        | Commercial building                 |
| K3 | MULTI-STORY DEPARTMENT STORE                                                    | Store buildings        | Commercial building                 |
| K5 | STAND-ALONE FOOD ESTABLISHMENT                                                  | Store buildings        | Commercial building                 |
| K8 | BIG BOX RETAIL: NOT AFFIXED & STANDING ON OWN LOT W/PARKING; E.G. COSTCO & BJ'S | Store buildings        | Commercial building                 |
| K9 | MISCELLANEOUS STORE BUILDING                                                    | Store buildings        | Commercial building                 |
| RK | RETAIL SPACE                                                                    | Condominiums           | Commercial building                 |
| R5 | MISCELLANEOUS COMMERCIAL                                                        | Condominiums           | Commercial building                 |
| P1 | CONCERT HALL                                                                    | Indoor public          | Art                                 |

P7

MUSEUM

assembly & cult.

Facilities

Indoor public

assembly & cult.

Facilities

Art

---

**Table S2. Prompt templates**

| <b>Data combination</b> | <b>Promote</b>                                                                                                                                                                                                                                                                                                                                                                                                                                                                                                                                                                                                                                                                                                                                                                                                                                                                                                                                                                                                                                                                                                                                                                                                                                                                                                                                                                                                                                                                                                                                                                  |
|-------------------------|---------------------------------------------------------------------------------------------------------------------------------------------------------------------------------------------------------------------------------------------------------------------------------------------------------------------------------------------------------------------------------------------------------------------------------------------------------------------------------------------------------------------------------------------------------------------------------------------------------------------------------------------------------------------------------------------------------------------------------------------------------------------------------------------------------------------------------------------------------------------------------------------------------------------------------------------------------------------------------------------------------------------------------------------------------------------------------------------------------------------------------------------------------------------------------------------------------------------------------------------------------------------------------------------------------------------------------------------------------------------------------------------------------------------------------------------------------------------------------------------------------------------------------------------------------------------------------|
| Street view image       | <p>'System': "You have to analyze the picture in the following sequences:</p> <ol style="list-style-type: none"> <li>1. Analyze the features of the building in front of the picture;</li> <li>2. Analyze its surroundings;</li> <li>3. Integrate the two analytical approaches above to determine the functional classification of the depicted building from (Art; Commercial building; Commercial building-bank; Commercial building-shopping center; Commercial building mix; Education; Entertainment; Entertainment mix; Factory; Garages; Hotels; Medicine; Office; Office mix; Organization; Parking lot; Profession service; Public service; Public service for poor; Religion; Religion mix; Residential; Residential mix; Sport; Warehouse; Fundamental infrastructure)." <hr/> <p>'User': "Briefly summarize what your analysis is and specify your decision in JSON format, like</p> <pre>{'analysis':(the analysis process), 'reason': (briefly decision reason), 'building category': (only choose the category in the list (Art; Commercial building; Commercial building-bank; Commercial building-shopping center; Commercial building mix; Education; Entertainment; Entertainment mix; Factory; Garages; Hotels; Medicine; Office; Office mix; Organization; Parking lot; Profession service; Public service; Public service for poor; Religion; Religion mix; Residential; Residential mix; Sport; Warehouse; Fundamental infrastructure)), 'additional note': possible category if other information is provided without other content}.</pre> </li></ol> |
| Satellite image         | <p>'System': "You have to analyze the picture in the following sequences:</p> <ol style="list-style-type: none"> <li>1. Analyze the features of the building within the red line;</li> <li>2. Analyze its surroundings;</li> </ol>                                                                                                                                                                                                                                                                                                                                                                                                                                                                                                                                                                                                                                                                                                                                                                                                                                                                                                                                                                                                                                                                                                                                                                                                                                                                                                                                              |

3. Combine the two analysis and determine which category the building in the picture belongs to (Art; Commercial building; Commercial building-bank; Commercial building-shopping center; Commercial building mix; Education; Entertainment; Entertainment mix; Factory; Garages; Hotels; Medicine; Office; Office mix; Organization; Parking lot; Profession service; Public service; Public service for poor; Religion; Religion mix; Residential; Residential mix; Sport; Warehouse; Fundamental infrastructure)."

'User': "Briefly summarize what your analysis is and specify your decision in JSON format, like

{'analysis':(the analysis process),

'reason': (briefly decision reason),

'building category': (only choose the category in the list (Art; Commercial building; Commercial building-bank; Commercial building-shopping center; Commercial building mix; Education; Entertainment; Entertainment mix; Factory; Garages; Hotels; Medicine; Office; Office mix; Organization; Parking lot; Profession service; Public service; Public service for poor; Religion; Religion mix; Residential; Residential mix; Sport; Warehouse; Fundamental infrastructure)),

'additional note': possible category if other information is provided and without other content}"

---

'System': "The user will provide the description text of the building, please follow the following sequences to infer its building function:

1. Infer the social background of the city according to the street and the semantic information of the building in the content;

2. Analyze the POI name of the building, analyze each POI name of the building, judge the corresponding function of each POI, and compare their possible size with the height of the building;

3. Based on the results of steps 1 and 2,

Building description text

determine which category the building belongs to (Art; Commercial building; Commercial building-bank; Commercial building-shopping center; Commercial building mix; Education; Entertainment; Entertainment mix; Factory; Garages; Hotels; Medicine; Office; Office mix; Organization; Parking lot; Profession service; Public service; Public service for poor; Religion; Religion mix; Residential; Residential mix; Sport; Warehouse; Fundamental infrastructure)."

---

'User': "Description text: (%s). Briefly summarize what your analysis and specify your findings in JSON format, like

{'analysis':(the analysis process),

'reason': (briefly decision reason),

'building category': (only the category (Art; Commercial building; Commercial building-bank; Commercial building-shopping center; Commercial building mix; Education; Entertainment; Entertainment mix; Factory; Garages; Hotels; Medicine; Office; Office mix; Organization; Parking lot; Profession service; Public service; Public service for poor; Religion; Religion mix; Residential; Residential mix; Sport; Warehouse; Fundamental infrastructure)),

'additional note': possible category if other information is provided without other content."

---

'System': "You have to analyze the picture in the following sequences to infer its building function:

1. Analyze the features of the building in front of the picture and its surroundings;

2. Analyze the description text of the building itself

2.1, infer the social background of the city according to the street address;

2.2, infer the semantic information of the building in the content;

2.3, analyze each POI name of the building, judge the corresponding function of each POI, and compare their possible size

Street + Text

with the height of the building;

3. Combine the analysis above and then infer which category the building in the picture belongs to (Art; Commercial building; Commercial building-bank; Commercial building-shopping center; Commercial building mix; Education; Entertainment; Entertainment mix; Factory; Garages; Hotels; Medicine; Office; Office mix; Organization; Parking lot; Profession service; Public service; Public service for poor; Religion; Religion mix; Residential; Residential mix; Sport; Warehouse; Fundamental infrastructure)."

'User': "Building description (%s); Briefly summarize your analysis and specify your findings in JSON format, like

```
{'analysis':  
    {'features of the building':(step 1),  
     'description text of the building  
itself':(step 2),  
     'the combined analysis and  
judgment': (step 3)},  
    'reason': (briefly decision reason),  
    'building category': (only choose the  
category in the list (Art; Commercial building;  
Commercial building-bank; Commercial  
building-shopping center; Commercial  
building mix; Education; Entertainment;  
Entertainment mix; Factory; Garages; Hotels;  
Medicine; Office; Office mix; Organization;  
Parking lot; Profession service; Public service;  
Public service for poor; Religion; Religion  
mix; Residential; Residential mix; Sport;  
Warehouse; Fundamental infrastructure)),  
    'additional note': possible category if  
other information is provided without other  
content}."
```

---

'System': "You have to analyze the picture in the following sequences to infer its building function:

Satellite + Text

1. Analyze the features of the building within the red line and its surroundings;
2. Analyze the description text of the building itself

2.1, infer the social background of the city according to the street address;

2.2, infer the semantic information of the building in the content;

2.3, analyze each POI name of the building, judge the corresponding function of each POI, and compare their possible size with the height of building;

3. Combine the analysis above and then infer which category the building in the picture belongs to (Art; Commercial building; Commercial building-bank; Commercial building-shopping center; Commercial building mix; Education; Entertainment; Entertainment mix; Factory; Garages; Hotels; Medicine; Office; Office mix; Organization; Parking lot; Profession service; Public service; Public service for poor; Religion; Religion mix; Residential; Residential mix; Sport; Warehouse; Fundamental infrastructure)."

---

'User': "building description (%s); Briefly summarize your analysis and specify your findings in JSON format, like

{'analysis':

{'features of the building':(step 1),

'description text of the building itself':(step 2),

'The combined analysis and judgment': (step 3)},

'reason': (briefly decision reason),

'building category': (only choose the category in the list (Art; Commercial building; Commercial building-bank; Commercial building-shopping center; Commercial building mix; Education; Entertainment; Entertainment mix; Factory; Garages; Hotels; Medicine; Office; Office mix; Organization; Parking lot; Profession service; Public service; Public service for poor; Religion; Religion mix; Residential; Residential mix; Sport; Warehouse; Fundamental infrastructure)),

'additional note': possible category if other information is provided without other content}"

'System': "You have to analyze the picture in the following sequences to infer its building function:

1. Analyze the features of the building in front of the picture and its surroundings (Picture 2);

2. Analyze the features of the building within the red line and its surroundings (Picture 1);

3. Combine the analysis above and then infer which category the building in the picture belongs to (Art; Commercial building; Commercial building-bank; Commercial building-shopping center; Commercial building mix; Education; Entertainment; Entertainment mix; Factory; Garages; Hotels; Medicine; Office; Office mix; Organization; Parking lot; Profession service; Public service; Public service for poor; Religion; Religion mix; Residential; Residential mix; Sport; Warehouse; Fundamental infrastructure)."

Street + Satellite

'User': "Briefly summarize what your analysis is and specify your findings in JSON format, like

```
{'analysis':  
  {'features of the building in  
picture1':(step 1),  
  'features of the building in  
picture2':(step 2),  
  'the combined analysis and  
judgment': (step 3)},  
  'reason': (briefly decision reason),  
  'building category': (only choose the  
category in the list (Art; Commercial building;  
Commercial building-bank; Commercial  
building-shopping center; Commercial  
building mix; Education; Entertainment;  
Entertainment mix; Factory; Garages; Hotels;  
Medicine; Office; Office mix; Organization;  
Parking lot; Profession service; Public service;  
Public service for poor; Religion; Religion  
mix; Residential; Residential mix; Sport;  
Warehouse; Fundamental infrastructure)),  
  'additional note': possible category if
```

other information is provided without other content"

---

'System': "You have to analyze the picture in the following sequences to infer its building function:

1. Analyze the features of the building in front of the picture and its surroundings (Picture 2);

2. Analyze the features of the building within the red line and its surroundings (Picture 1);

3. Analyze the description text of the building itself

3.1, infer the social background of the city according to the street address;

3.2, infer the semantic information of the building in the content;

3.3, analyze each POI name of the building, judge the corresponding function of each POI, and compare their possible size with the height of the building;

4. Combine the analysis above and then infer which category the building in the picture belongs to (Art; Commercial building; Commercial building-bank; Commercial building-shopping center; Commercial building mix; Education; Entertainment; Entertainment mix; Factory; Garages; Hotels; Medicine; Office; Office mix; Organization; Parking lot; Profession service; Public service; Public service for poor; Religion; Religion mix; Residential; Residential mix; Sport; Warehouse; Fundamental infrastructure)."

---

Street + Satellite + Text

'User': "Building description (%s);

Briefly summarize what your analysis is and specify your findings in JSON format, like

{'analysis':

'features of the building in picture1':(step 1),

'features of the building in picture2':(step 2),

'description text of the building itself':(step 3),

'the combined analysis and

judgment': (step 4)},

'reason': (briefly decision reason),

'building category': (only choose the category in the list (Art; Commercial building; Commercial building-bank; Commercial building-shopping center; Commercial building mix; Education; Entertainment; Entertainment mix; Factory; Garages; Hotels; Medicine; Office; Office mix; Organization; Parking lot; Profession service; Public service; Public service for poor; Religion; Religion mix; Residential; Residential mix; Sport; Warehouse; Fundamental infrastructure)),

'additional note': possible category if other information is provided without other content."

---

'System': "You have to analyze the picture in the following sequences to infer its building function:

1. Analyze the features of the building in front of the picture and its surroundings;

2. Analyze the description text of the building itself

2.1, infer the social background of the city according to the street address;

2.2, infer the semantic information of the building in the content;

2.3, analyze each POI name of the building, judge the corresponding function of each POI, and compare their possible size with the height of building;

3. Combine the analysis above and then infer which category the building in the picture belongs to (Recreation; Commercial building; Mixed (the mixed used building); Education; Factory; Garages; Hospital; Office; Organization; Parking lot; Public service (including fundamental infrastructure); Religion; Residential)."

Street + Text (Land use)

---

'User': "building description (%s); Briefly summarize your analysis and specify your findings in JSON format, like

{'analysis':

{'features of the building':(step 1),

---

'description text of the building itself:(step 2),

'The combined analysis and judgment': (step 3)},

'reason': (briefly decision reason),

'building category': (only choose the category in the list (Recreation; Commercial building; Mixed(the mixed-use building); Education; Factory; Garages; Hospital; Office; Organization(including embassy); Parking lot; Public service(including fundamental infrastructure); Religion; Residential),

'additional note': possible category if other information is provided without other content"}  

---

'System': "You have to analyze the picture in the following sequences to infer its building function:

1. Analyze the features of the building in front of the picture and its surroundings (Picture 2);

2. Analyze the features of the building within the red line and its surroundings (Picture 1);

3. Analyze the description text of the building itself

3.1, infer the social background of the city according to the street address;

3.2, infer the semantic information of the building in the content;

3.3, analyze each POI name of the building, judge the corresponding function of each POI, and compare their possible size with the height of the building;

4. Combine the analysis above, read the category definition(%s), and then infer which category the building in the picture belongs to (Art; Commercial building; Commercial building-bank; Commercial building-shopping center; Commercial building mix; Education; Entertainment; Entertainment mix; Factory; Garages; Hotels; Medicine; Office; Office mix; Organization; Parking lot; Profession service; Public service; Public service for

---

Street + Satellite + Text (Supplement)

---

poor; Religion; Religion mix; Residential; Residential mix; Sport; Warehouse; Fundamental infrastructure)."

'User': "Building description (%s); Briefly summarize your analysis and specify your findings in JSON format, like

{'analysis':

'features of the building in picture1':(step 1),

'features of the building in picture2':(step 2),

'description text of the building itself':(step 3),

'the combined analysis and judgment': (step 4)},

'reason': (briefly decision reason),

'building category': (only choose the category in the list (Art; Commercial building; Commercial building-bank; Commercial building-shopping center; Commercial building mix; Education; Entertainment; Entertainment mix; Factory; Garages; Hotels; Medicine; Office; Office mix; Organization; Parking lot; Profession service; Public service; Public service for poor; Religion; Religion mix; Residential; Residential mix; Sport; Warehouse; Fundamental infrastructure)),

'additional note': (possible category if other information is provided)} without other content"

---

**Table S3. Definition of Land use (14)**

| <b>Code</b> | <b>Building function</b>             | <b>Land use</b>     |
|-------------|--------------------------------------|---------------------|
| 1           | Art                                  | Recreation          |
| 2           | Commercial building                  | Commercial building |
| 3           | Commercial building-bank             | Commercial building |
| 4           | Commercial building-shopping center, | Commercial building |
| 5           | Commercial building mix              | Mixed               |
| 6           | Education                            | Education           |
| 7           | Entertainment                        | Recreation          |
| 8           | Entertainment mix                    | Mixed               |
| 9           | Factory                              | Factory             |
| 10          | Garages,                             | Garages,            |
| 11          | Hotels                               | Commercial building |
| 12          | Medicine,                            | Medicine            |
| 13          | Office                               | Office              |
| 14          | Office mix                           | Mixed               |
| 15          | Organization                         | Organization        |
| 16          | Parking lot                          | Parking lot         |
| 17          | Profession service                   | Office              |
| 18          | Public service                       | Public service      |
| 19          | Public service for poor              | Public service      |
| 20          | Religion                             | Religion            |
| 21          | Religion mix                         | Religion            |

|    |                            |                |
|----|----------------------------|----------------|
| 22 | Residential                | Residential    |
| 23 | Residential mix            | Mixed          |
| 24 | Sport                      | Recreation     |
| 25 | Warehouse,                 | Factory        |
| 26 | Fundamental infrastructure | Public service |

**Table S4. Modal input**

| Modal | Data                                                 | Input type     |
|-------|------------------------------------------------------|----------------|
| Image | Street view image                                    | URL            |
|       | Remote sensing image                                 | URL            |
| Text  | Building address, building height, and building year | Structure text |
|       | POI                                                  | Structure text |

**Definition of Structure text:** This building is located in New York City, it is built in %(building year), its height is %(building height)ft, its address is %(building address), and the point of interest within it are [List of POI name]

**Table S5. Cost of each large model**

| Large model                 | Input token cost/million | Output token cost/million |
|-----------------------------|--------------------------|---------------------------|
| Deepseek-chat               | 0.07                     | 1.14                      |
| QVQ-plus                    | 0.03                     | 0.07                      |
| Claude-sonnet-4             | 3                        | 15                        |
| Gemini-2.5-flash (Thinking) | 1                        | 2.5                       |

---

**Algorithm S1 Deep search**

---

**Input:** building footprint `b_shp`

**Output:** POIs `P`

**Function** `deep search poi (b_shp)`

`Boundary = b_shp.boundary;`

`Parts = Boundary.divide (4); // divide the boundary into four rectangle`

`P = []; // empty list to store the POIs`

**For** (`i = 0; i < len (Parts); i++`) **do**

`p = Algorithm S2 (Parts[i]); // the POIs within the divided part`

**if** (`len (p) ≥ 20`) **then**

`p = deep search poi (Parts[i]);`

`P.extend (p);`

**Return** `P`

`P = Algorithm S2 (b_shp)`

**if** (`len (P) ≥ 20`) **then**

`P = deep search poi (b_shp);`

`P = P.filter (place_id); // remove the POIs with the same place_id`

`P = P.filter (b_shp); // select the POIs within the building`

**Return** `P`

---

---

**Algorithm S2 Crawling POIs from Google Maps**

---

**Input:** building footprint `b_shp`

**Output:** POIs `P`

`Centroid = b_shp.centroid; // Compute the centroid of building footprint`

`Boundary = b_shp.boundary; // Compute the boundary of building footprint`

`Radius = Sqrt ( (Boundary.x)2 + (Boundary.y)2 ) / 2; // Compute the radius for crawling POI`

`P = Google Maps.place_api (Centroid, Radius)`

**Return** `P`

---

**Evaluation prompt**

**System prompt:** "Analyze the following building function categories and their descriptions, and determine if they are logically consistent. If they are not, please provide a brief explanation of the inconsistency."

**User prompt:** "Read the provided building function categories and their descriptions(%s), and return the results in the following JSON format: 'logical\_analysis': 'True' or 'False', 'reason': 'explanation of the inconsistency if False'."

## **Section S3. Evaluation criteria**

### **Criteria of the model's output evaluation**

Definition of accurate remote sensing descriptions: Whether the model can accurately describe the characteristics of the building in the red line and its surroundings, even though it can not capture all the important information.

Definition of accurate street view descriptions: Whether the model can accurately describe the characteristics of the building in the street view image, which is outlined in the aerial image, even though it can not capture all the important information.

Definition of accurate text descriptions: Whether the model can accurately understand the semantic information behind the building address, building height, building year, and the name of the POI within the building, and then combine the analysis of text information.

Definition of logic combination analysis: Whether the combination analysis is logical, judged by human and large language model (LLM)

Definition of conflicts between results and analysis: Whether the conclusion of the combination analysis and the final result of the model are discrepancy.

Definition of helpful additional information: Whether the additional information points out the potential category of the building, once the additional information is provided, or the other categories.

### **Definition of model errors**

Definition of category ambiguity: The building function categories output by the model are either semantically correct or exhibit ambiguity with the original annotations.

Definition of origin annotation error: The building function categories output by the model are more adherent to the original one.

Definition of insufficient evidence: The evidence is unable to infer the origin building function even if it is inferred by human.

Definition of recognition failure: The model is unable to recognize the building.

Definition of spatial relation errors: The model fails to accurately localize buildings across multi-view perspectives or comprehensively interpret their semantic information.

Definition of POI semantic misinterpretation: The model misinterprets the semantic meaning of the POI's name.
